# Supplementary material for: Interaction and behaviour imaging: a novel method to measure mother–infant interaction using video 3D reconstruction
Source: PubMed Central journal article supplement (PMC5070050; doi:10.1038/tp.2016.82), 2016-05-24
Supplement: tp201682x2.pdf [file tp201682x2.pdf]

| <b>Table S1. Correlation between CIB interactive composite scores and 2D and 3D motion features</b> |                                   |                                  |                                  |                                 |                                  |                                  |                                 |                                 |
|-----------------------------------------------------------------------------------------------------|-----------------------------------|----------------------------------|----------------------------------|---------------------------------|----------------------------------|----------------------------------|---------------------------------|---------------------------------|
|                                                                                                     | <b>CIB interactive composites</b> |                                  |                                  |                                 |                                  |                                  |                                 |                                 |
|                                                                                                     | <b>Maternal sensitivity</b>       | <b>Mother limit setting</b>      | <b>Mother intrusiveness</b>      | <b>Dyadic reciprocity</b>       | <b>Negative dyadic status</b>    | <b>Infant avoidance</b>          | <b>Infant engagement</b>        | <b>Infant compliance</b>        |
| <b>Individual parameters</b>                                                                        |                                   |                                  |                                  |                                 |                                  |                                  |                                 |                                 |
| Mother quantity of movement                                                                         | -0.44<br><i>p</i> =0.06           | <b>-0.54</b><br><i>p</i> =0.018  | <b>0.58</b><br><i>p</i> =0.009   | -0.44<br><i>p</i> =0.06         | 0.15<br><i>p</i> =0.53           | 0.22<br><i>p</i> =0.37           | -0.44<br><i>p</i> =0.06         | -0.35<br><i>p</i> =0.14         |
| Mother activity ratio                                                                               | <b>-0.6</b><br><i>p</i> =0.007*   | <b>-0.65</b><br><i>p</i> =0.003* | <b>0.59</b><br><i>p</i> =0.008*  | <b>-0.53</b><br><i>p</i> =0.02  | <b>0.47</b><br><i>p</i> =0.044   | <b>0.59</b><br><i>p</i> =0.008*  | -0.44<br><i>p</i> =0.06         | -0.24<br><i>p</i> =0.32         |
| Infant quantity of movement                                                                         | -0.26<br><i>p</i> =0.28           | -0.35<br><i>p</i> =0.147         | <b>0.48</b><br><i>p</i> =0.038   | -0.27<br><i>p</i> =0.26         | -0.08<br><i>p</i> =0.74          | 0.15<br><i>p</i> =0.54           | -0.2<br><i>p</i> =0.41          | -0.05<br><i>p</i> =0.84         |
| Infant activity ratio                                                                               | <b>-0.48</b><br><i>p</i> =0.037   | -0.36<br><i>p</i> =0.13          | 0.31<br><i>p</i> =0.19           | <b>-0.47</b><br><i>p</i> =0.04  | 0.4<br><i>p</i> =0.088           | <b>0.47</b><br><i>p</i> =0.044   | -0.37<br><i>p</i> =0.12         | -0.36<br><i>p</i> =0.13         |
| <b>Synchrony parameters</b>                                                                         |                                   |                                  |                                  |                                 |                                  |                                  |                                 |                                 |
| <b>Dynamics of partners heads distance</b>                                                          |                                   |                                  |                                  |                                 |                                  |                                  |                                 |                                 |
| Mother contribution to heads distance                                                               | -0.09<br><i>p</i> =0.71           | 0.23<br><i>p</i> =0.34           | 0.18<br><i>p</i> =0.47           | -0.14<br><i>p</i> =0.56         | -0.21<br><i>p</i> =0.39          | -0.28<br><i>p</i> =0.25          | -0.12<br><i>p</i> =0.63         | 0.34<br><i>p</i> =0.15          |
| Infant contribution to heads distance                                                               | 0.1<br><i>p</i> =0.67             | -0.22<br><i>p</i> =0.37          | -0.19<br><i>p</i> =0.43          | 0.16<br><i>p</i> =0.52          | 0.2<br><i>p</i> =0.42            | 0.26<br><i>p</i> =0.28           | 0.14<br><i>p</i> =0.58          | -0.33<br><i>p</i> =0.17         |
| <b>Focus of engagement</b>                                                                          |                                   |                                  |                                  |                                 |                                  |                                  |                                 |                                 |
| % of time spent face to face                                                                        | 0.41<br><i>p</i> =0.08            | <b>0.51</b><br><i>p</i> =0.026   | -0.34<br><i>p</i> =0.15          | <b>0.44</b><br><i>p</i> =0.057  | <b>-0.44</b><br><i>p</i> =0.057  | <b>-0.61</b><br><i>p</i> =0.005* | 0.42<br><i>p</i> =0.076         | 0.37<br><i>p</i> =0.12          |
| % of time spent looking together at the table                                                       | -0.2<br><i>p</i> =0.4             | -0.14<br><i>p</i> =0.57          | 0.06<br><i>p</i> =0.8            | -0.25<br><i>p</i> =0.29         | -0.06<br><i>p</i> =0.81          | 0.03<br><i>p</i> =0.9            | -0.26<br><i>p</i> =0.275        | -0.13<br><i>p</i> =0.59         |
| <b>Dynamics of motion activity</b>                                                                  |                                   |                                  |                                  |                                 |                                  |                                  |                                 |                                 |
| Synchrony ratio: Parent response to Infant                                                          | <b>-0.54</b><br><i>p</i> =0.017   | <b>-0.62</b><br><i>p</i> =0.004* | <b>0.61</b><br><i>p</i> =0.005*  | <b>-0.48</b><br><i>p</i> =0.039 | <b>0.48</b><br><i>p</i> =0.038   | <b>0.59</b><br><i>p</i> =0.008*  | -0.41<br><i>p</i> =0.08         | -0.22<br><i>p</i> =0.38         |
| Synchrony ratio: Infant response to Parent                                                          | -0.2<br><i>p</i> =0.4             | -0.12<br><i>p</i> =0.62          | 0.09<br><i>p</i> =0.7            | -0.23<br><i>p</i> =0.34         | 0.22<br><i>p</i> =0.37           | 0.28<br><i>p</i> =0.24           | -0.26<br><i>p</i> =0.28         | <b>-0.46</b><br><i>p</i> =0.047 |
| Overlap ratio                                                                                       | <b>-0.56</b><br><i>p</i> =0.012   | <b>-0.53</b><br><i>p</i> =0.02   | <b>0.46</b><br><i>p</i> =0.049   | <b>-0.5</b><br><i>p</i> =0.03   | <b>0.5</b><br><i>p</i> =0.028    | <b>0.6</b><br><i>p</i> =0.007*   | -0.38<br><i>p</i> =0.11         | -0.18<br><i>p</i> =0.46         |
| Pause ratio                                                                                         | <b>-0.66</b><br><i>p</i> =0.002*  | <b>0.64</b><br><i>p</i> =0.003*  | <b>-0.63</b><br><i>p</i> =0.004* | <b>0.61</b><br><i>p</i> =0.005* | <b>-0.55</b><br><i>p</i> =0.014* | <b>-0.63</b><br><i>p</i> =0.004* | <b>0.52</b><br><i>p</i> =0.023* | 0.44<br><i>p</i> =0.06          |

CIB=Coding Interactive Behavior; \**p*≤0.05 with Holm corrected *p*-value.
